# Supplementary material for: FNBP1 Facilitates Cervical Cancer Cell Survival by the Constitutive Activation of FAK/PI3K/AKT/mTOR Signaling
Source: MDPI journal article supplement (doi:10.3390/cells12151964), 2023-07-29
Supplement: s1 [file s1]

**Tab. S1 Nucleotide sequences of shRNAs targeting FNBP1**

| shRNA | Sequences                                                                                                                                                                         | Location<br>NM_001363755.1 |
|-------|-----------------------------------------------------------------------------------------------------------------------------------------------------------------------------------|----------------------------|
| 1     | 5'-gatc <u>GCAGAAAGTCGATGAGTTA</u> ttcaagagaTAACTCATCGA<br>CTTTCTGCtttttgtcgaca-3'<br>3'-gCGTCTTTCAGCTACTCAATaagttctctATTGAGTAGCTGAAAG<br>ACGaaaaaacagctgttcga-5'                 | 1464-1482                  |
| 2     | 5'-gatc <u>CCCACTTCATATGTCGAAGTCTG</u> ttcaagagaCAGACTTC<br>GACATATGAAGTGGGtttttgtcgaca-3'<br>3'-gGGGTGAAGTATACAGCTTCAGACAagttctctGTCTGAAGCTG<br>TATACTTCACCCaaaaaacagctgttcga-5' | 2023-2045                  |
| 3     | 5'-gatc <u>CGGAGAAACATTGTATGTCA</u> ttcaagagaTGACATACAAT<br>GTTTCTCCtttttgtcgaca-3'<br>3'-gCCTCTTTGTAAACATACAGTaagttctctACTGTATGTTACAAAG<br>AGGaaaaaacagctgttcga-5'               | 1939-1957                  |
